# Supplementary material for: MRI techniques for immunotherapy monitoring
Source: PubMed Central journal article supplement (PMC9486399; doi:10.1136/jitc-2022-004708), 2022-09-19
Supplement: jitc-2022-004708supp002.pdf [file jitc-2022-004708supp002.pdf]

**Supplemental Table S1.** Overview of MRI techniques used in monitoring cancer immunotherapy.

| <b>Biological Phenomenon</b>                  | <b>MRI Techniques</b>                                                                                              | <b>Application</b>                                                                                                          | <b>Stage of Testing</b>               | <b>References</b> |
|-----------------------------------------------|--------------------------------------------------------------------------------------------------------------------|-----------------------------------------------------------------------------------------------------------------------------|---------------------------------------|-------------------|
| <b>Tissue characterization</b>                | T <sub>1</sub> -weighted MRI<br>T <sub>2</sub> -weighted MRI                                                       | Tissue characterization                                                                                                     | Clinical                              | 5, 39             |
| <b>Tumor Cellularity</b>                      | DWI, IVIM, DKI                                                                                                     | Tumor cell death or cell loss following immune checkpoint blockade, dendritic cell vaccination, and adenoviral gene therapy | Clinical                              | 5, 46, 48, 49     |
| <b>Vascular Permeability and Inflammation</b> | Contrast enhanced MRI                                                                                              | Qualitative assessment of tissue vascularity                                                                                | Clinical                              | 40                |
|                                               | DCE-MRI                                                                                                            | Quantitative measures of vascular permeability following immune checkpoint blockade                                         | Clinical                              | 5, 54             |
|                                               | Antibody-conjugated MPIO<br>e.g. VCAM-1                                                                            | Vascular inflammation following PD-L1 monotherapy                                                                           | Preclinical                           | 56                |
| <b>Tumor Metabolism</b>                       | <sup>1</sup> H-MRS                                                                                                 | <i>In vivo</i> assessment of metabolites                                                                                    | Clinical                              | 73                |
|                                               | CEST MRI                                                                                                           | Measurement of targeted metabolites                                                                                         | Clinical                              | 74                |
|                                               | Hyperpolarized <sup>13</sup> C-MRI<br>[1- <sup>13</sup> C]pyruvate<br>[1,4- <sup>13</sup> C <sub>2</sub> ]fumarate | Glycolysis<br>Cell Death                                                                                                    | Preclinical / Clinical<br>Preclinical | 84, 85, 86<br>85  |

|                                      |                                                                                                               |                                                                                       |                        |                |
|--------------------------------------|---------------------------------------------------------------------------------------------------------------|---------------------------------------------------------------------------------------|------------------------|----------------|
| <b>Tracking Labeled Leukocytes</b>   | SPIO                                                                                                          | Therapies targeting tumor-associated macrophages e.g. anti-CD47 monoclonal antibodies | Preclinical / Clinical | 96, 97, 98, 99 |
|                                      | <sup>19</sup> F-PFC                                                                                           | Cell-based therapies e.g. T cells, NK cells, DCs                                      | Preclinical / Clinical | 107, 108, 109  |
| <b>Reporter Gene Imaging</b>         | Lysine-rich protein                                                                                           | Oncolytic viral therapy                                                               | Preclinical            | 122            |
|                                      | Ferritin                                                                                                      | Dendritic cell vaccination                                                            | Preclinical            | 123            |
|                                      | Nucleoside kinase                                                                                             | Dendritic cell vaccination                                                            | Preclinical            | 124            |
| <b>Immune-related Adverse Events</b> | T <sub>1</sub> -weighted MRI                                                                                  | Encephalomyelitis                                                                     | Clinical               | 141            |
|                                      | T <sub>2</sub> -weighted MRI                                                                                  |                                                                                       |                        |                |
|                                      | T <sub>1</sub> /T <sub>2</sub> -mapping                                                                       | Colitis                                                                               | Clinical               | 142, 143, 144  |
|                                      | Late gadolinium enhancement                                                                                   |                                                                                       |                        |                |
|                                      | DCE-MRI                                                                                                       | Hepatitis                                                                             | Clinical               | 145            |
|                                      | DWI                                                                                                           |                                                                                       |                        |                |
| <b>Hybrid Imaging</b>                | MRE                                                                                                           | Inflammatory Arthritis                                                                | Clinical               | 146            |
|                                      |                                                                                                               | Myocarditis                                                                           | Clinical               | 147            |
|                                      | DWI + [ <sup>18</sup> F]FDG PET (Tumor cellularity + glucose metabolism)                                      | Immune checkpoint inhibitors                                                          | Clinical               | 160, 161       |
|                                      | T <sub>2</sub> -weighted MRI, Contrast enhanced T <sub>1</sub> -weighted MRI, DWI + [ <sup>18</sup> F]CFA PET | Dendritic cell vaccination                                                            | Preclinical / Clinical | 162            |

(Tumor cellularity and  
vascularity + deoxycytidine  
kinase activity)

[64]Cu labeled SPIO  
nanoparticles for cell tracking

CAR T cell therapy

Preclinical

163

---

*MRI = magnetic resonance imaging; DWI = diffusion-weighted imaging; IVIM = intravoxel incoherent motion; DKI = diffusion kurtosis imaging; DCE-MRI = dynamic contrast-enhanced MRI; MPIO = microparticles of iron oxide; MRS = magnetic resonance spectroscopy; CEST MRI = chemical exchange saturation transfer (CEST); SPIO: superparamagnetic iron oxide; <sup>19</sup>F-PFC = Fluorine-19 perfluorocarbon; PET = positron emission tomography; [<sup>18</sup>F]FDG = Fluorine-18 fluorodeoxyglucose; [<sup>18</sup>F]CFA = 2-chloro-2'-deoxy-2'-[<sup>18</sup>F]fluoro-9-b-D-arabinofuranosyl-adenine.*

N.B. The MRI techniques described in this review were updated till July 2022. The focus is on clinical application and highlighting MRI methods investigated in cancer immunotherapy.
