# Supplementary material for: MRI techniques for immunotherapy monitoring
Source: PubMed Central journal article supplement (PMC9486399; doi:10.1136/jitc-2022-004708), 2022-09-19
Supplement: jitc-2022-004708supp003.pdf [file jitc-2022-004708supp003.pdf]

**Supplemental Table S2.**

List of abbreviations for the technical terms described in this review.

| <b>Abbreviation</b>     | <b>Technical Term</b>                                                                        |
|-------------------------|----------------------------------------------------------------------------------------------|
| CEST                    | Chemical exchange saturation transfer                                                        |
| CMR                     | Complete metabolic response                                                                  |
| CT                      | Computed tomography                                                                          |
| $D_{app}$               | Apparent diffusivity                                                                         |
| Dm-dNK                  | Drosophila melanogaster 2'-deoxynucleoside                                                   |
| DCE-MRI                 | Dynamic contrast-enhanced MRI                                                                |
| DWI                     | Diffusion-weighted imaging                                                                   |
| DKI                     | Diffusion kurtosis imaging                                                                   |
| EPR                     | Enhanced permeability and retention effects                                                  |
| [ $^{18}\text{F}$ ]CFA  | 2-chloro-2'-deoxy-2'-[ $^{18}\text{F}$ ]fluoro-9- $\beta$ -D-arabinofuranosyl-adenine        |
| [ $^{18}\text{F}$ ]FDG  | Fluorine-18 fluorodeoxyglucose                                                               |
| [ $^{18}\text{F}$ ]FLT  | Fluorine-18 fluorothymidine                                                                  |
| $^{19}\text{F}$ -PFC    | Fluorine-19 perfluorocarbon                                                                  |
| FLAIR                   | Fluid-attenuated Inversion Recovery                                                          |
| FTH                     | Ferritin                                                                                     |
| Gd-EOB-DTPA             | Gadolinium ethoxybenzyl diethylenetriamine pentaacetic acid                                  |
| HP $^{13}\text{C}$ -MRI | Hyperpolarized Carbon-13 MRI                                                                 |
| ICI                     | Immune checkpoint inhibitor                                                                  |
| irAEs                   | Immune-related adverse events                                                                |
| iRANO                   | Immune Response Assessment in Neuro-Oncology                                                 |
| irRC                    | Immune-related Response Criteria                                                             |
| $K_{app}$               | Apparent kurtosis                                                                            |
| $K^{trans}$             | Volume transfer constant from the blood plasma to the extravascular tumor interstitial space |
| LAG3                    | Lymphocyte activation gene 3                                                                 |
| LDH                     | Lactate dehydrogenase                                                                        |
| LGE                     | Late gadolinium enhancement                                                                  |
| LRP                     | Lysine-rich protein                                                                          |
| MPIO                    | Microparticles of iron oxide                                                                 |
| MRI                     | Magnetic resonance imaging                                                                   |
| MRS                     | Magnetic resonance spectroscopy                                                              |
| OATP                    | Organic anion transporting polypeptide                                                       |

|            |                                              |
|------------|----------------------------------------------|
| PET        | Positron emission tomography                 |
| pyrrolo-dC | pyrrolo-2'-deoxycytidine                     |
| RECIST     | Response Evaluation Criteria in Solid Tumors |
| SPECT      | Single photon emission computed tomography   |
| SPIO       | Superparamagnetic iron oxide                 |
| T1         | Spin-lattice or longitudinal relaxation time |
| T2         | Spin-spin or transverse relaxation time      |
| TLG        | Total lesion glycolysis                      |
| USPIO      | Ultrasmall superparamagnetic iron oxide      |
| $v_e$      | Fractional volume of the interstitial space  |
| $v_p$      | Fractional volume of the blood plasma        |
